# Supplementary material for: Extra Virgin Olive Oil and Nigella sativa Oil Produced in Central Italy: A Comparison of the Nutrigenomic Effects of Two Mediterranean Oils in a Low-Grade Inflammation Model
Source: PubMed Central journal article supplement (PMC7022781; doi:10.3390/antiox9010020), 2019-12-24
Supplement: antioxidants-09-00020-s001.pdf [file antioxidants-09-00020-s001.pdf]

| Gene          | Forward Primer                                                       | Reverse Primer                        |
|---------------|----------------------------------------------------------------------|---------------------------------------|
| <b>IL1b</b>   | TGAAAGATGATAAGCCCACTCTACA                                            | AGACTCAAATCCAGCTTGTATTG               |
| <b>IL6</b>    | TACCCCCAGGAGAAGATTCC                                                 | TTTTCTGCCAGTGCCTCTTT                  |
| <b>MCP1</b>   | TCCCAAAGAAGCTGTGATCTTCAAGACC                                         | AGTGAGTGTTCAAGTCTTCGGAGTTTGG          |
| <b>TET1</b>   | CAGAACCTAAACCACCCGTG                                                 | TGCTTCGTAGCGCCATTGTAA                 |
| <b>TET2</b>   | GATAGAACCAACCATGTTGAGGG                                              | TGGAGCTTTGTAGCCAGAGGT                 |
| <b>TET3</b>   | TCCAGCAACTCCTAGAACTGAG                                               | AGGCCGCTTGAATACTGACTG                 |
| <b>HDAC1</b>  | CATCTCCTCAGCATTGGCTT                                                 | CGAATCCGCATGACTCATAA                  |
| <b>HDAC2</b>  | ATGAGGCTTCATGGGATGAC                                                 | ATGGCGTACAGTCAAGGAGG                  |
| <b>HDAC3</b>  | CTGTGTAACGCGAGCAGAAC                                                 | GCAAGGCTTCACCAAGAGTC                  |
| <b>HPRT</b>   | GAGATGGGAGGCCATCACATTGTAGCCCTC                                       | CTCCACCAATTACTTTTATGTCCCCTGTTGACTGGTC |
| <b>DNMT1</b>  | PrimePCR™ SYBR® Green Assay: DNMT1, Human; assay ID: qhsacid0021977  |                                       |
| <b>DNMT3A</b> | PrimePCR™ SYBR® Green Assay: DNMT3A, Human; assay ID: qhsaced0042577 |                                       |
| <b>DNMT3B</b> | PrimePCR™ SYBR® Green Assay: DNMT3B, Human; assay ID: qhsacid0010863 |                                       |
